# Supplementary material
Source: PubMed Central journal article supplement (PMC3146050)
Supplement: NIHMS35520-supplement-1.pdf [file NIHMS35520-supplement-1.pdf]

## Dynamic CpG island methylation landscape in oocytes and its fate in preimplantation embryos

Sébastien A. Smallwood<sup>1</sup>, Shin-ichi Tomizawa<sup>1</sup>, Felix Krueger<sup>2</sup>, Nico Ruf<sup>1</sup>, Natasha Carli<sup>1</sup>, Anne Segonds-Pichon<sup>2</sup>, Shun Sato<sup>3</sup>, Kenichiro Hata<sup>3</sup>, Simon R. Andrews<sup>2</sup> and Gavin Kelsey<sup>1,4</sup>,

<sup>1</sup>Laboratory of Developmental Genetics and Imprinting, The Babraham Institute, Cambridge, CB22 3AT, UK

<sup>2</sup>Bioinformatics Group, The Babraham Institute, Cambridge, CB22 3AT, UK

<sup>3</sup>Department of Maternal-Fetal Biology, National Research Institute for Child Health and Development, 2-10-1 Okura, Setagaya, Tokyo 157-8535, Japan

<sup>4</sup>Centre for Trophoblast Research, University of Cambridge, Cambridge, CB2 3EG, UK

### Supplementary Information.

**Supplementary Figure 1: Statistics of RRBS Illumina sequencing.** **a**, Illumina sequencing read coverage at CGIs for nine representative RRBS datasets, showing that the majority of CGIs with appropriate MspI fragments are deeply sequenced. **b**, Summary of RRBS outputs for all datasets presenting the number of individual CpGs sequenced with a read depth  $\geq 5$  (informative CpGs), the number of informative CpGs located within CGIs, and the number of informative CGIs (for which informative CpGs represent  $\geq 10\%$  of all CpGs per CGI, with a minimum of 5 CpGs). **c**, For nine representative RRBS datasets, the percentage coverage of CGIs by CpGs with a read depth  $\geq 5$  is shown, demonstrating that the majority of the informative CGIs are observed at well above the cut-off of 10% of CpGs per CGIs. **d**, Illumina sequencing read coverage at individual CpGs for nine representative RRBS datasets, showing that the majority of CpGs are deeply sequenced. **e**, Summary statistics of two RRBS libraries independently prepared from 15ng or 500pg of the same genomic DNA (GV oocytes). **f**, Correlation of CGI methylation calls between RRBS libraries generated with 15ng or 500pg of the same genomic DNA, demonstrating the reproducibility of our protocol. CGIs with contradictory methylation calls (for example,  $\geq 75\%$  in the 500pg library and  $\leq 25\%$  in the 20ng one) were removed from subsequent analysis. **g**, Correlation of CGI methylation calls between RRBS libraries generated from GV oocytes (GV-Rep1) and *3a*<sup>+/+</sup> GV oocytes (3aWT-Rep1).

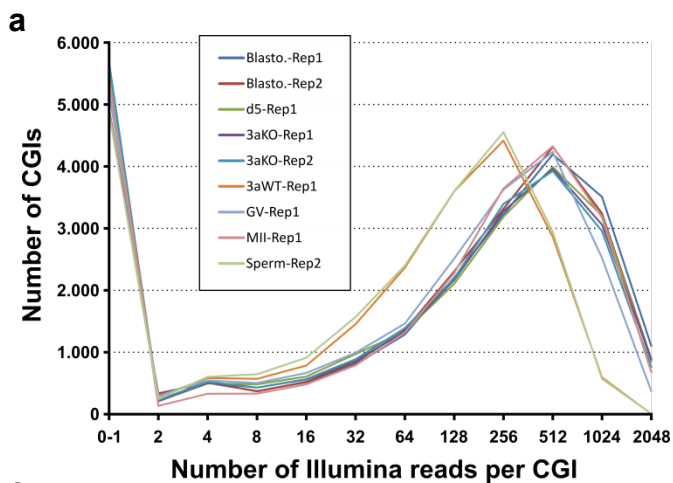

**b**

| Datasets     | Number of CpGs (>5reads) | Number of CpGs overlapping CGIs | Number of informative CGIs |
|--------------|--------------------------|---------------------------------|----------------------------|
| d5-Rep1      | 766,689                  | 647,433 (84.4%)                 | 13,241                     |
| d5-Rep2      | 898,635                  | 736,121 (81.9%)                 | 13,953                     |
| GV-Rep1      | 804,744                  | 650,327 (80.8%)                 | 13,280                     |
| GV-Rep2      | 494,080                  | 358,411 (72.5%)                 | 9,276                      |
| MII-Rep1     | 870,700                  | 685,313 (78.7%)                 | 13,660                     |
| Blasto.-Rep1 | 930,316                  | 743,878 (80.0%)                 | 14,088                     |
| Blasto.-Rep2 | 912,147                  | 738,468 (81.0%)                 | 14,023                     |
| Sperm-Rep1   | 905,126                  | 612,123 (67.6%)                 | 12,974                     |
| Sperm-Rep2   | 829,608                  | 577,057 (69.6%)                 | 12,644                     |
| 3aWT-Rep1    | 744,982                  | 574,343 (77.1%)                 | 12,526                     |
| 3aKO-Rep1    | 801,658                  | 662,807 (82.7%)                 | 13,022                     |
| 3aKO-Rep2    | 796,506                  | 659,294 (82.8%)                 | 13,069                     |
| 3LWT-Rep1    | 886,516                  | 714,043 (80.5%)                 | 13,650                     |
| 3LWT-Rep2    | 1,240,360                | 886,562 (71.5%)                 | 14,982                     |
| 3LKO-Rep1    | 773,081                  | 626,237 (81.0%)                 | 12,784                     |
| 3LKO-Rep2    | 1,004,009                | 722,496 (72.0%)                 | 13,787                     |

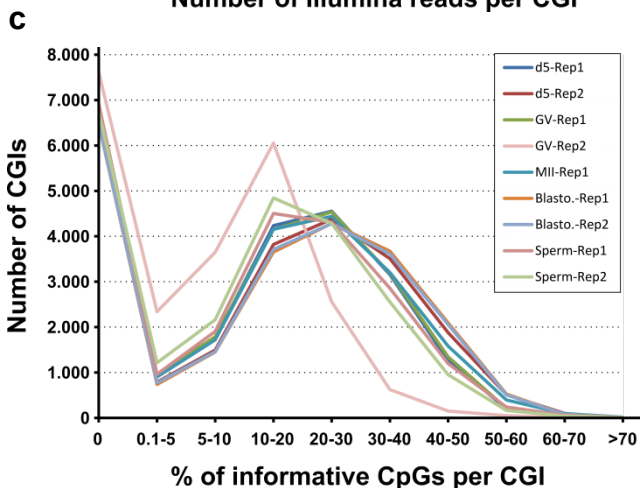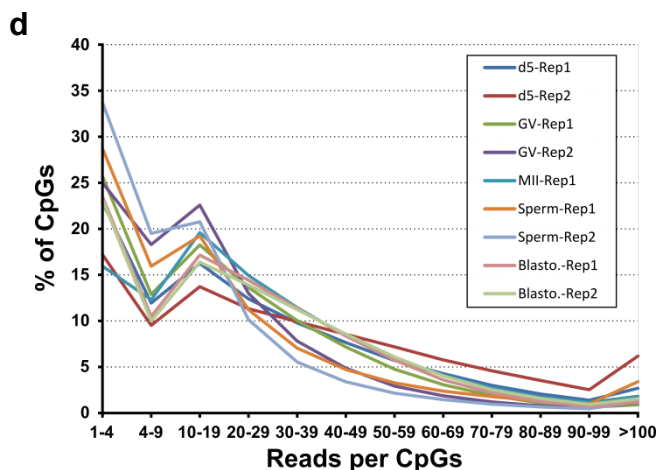

**e**

|                               | 15ng               | 500pg              |
|-------------------------------|--------------------|--------------------|
| number of sequences generated | 15,836,627         | 14,085,820         |
| number of MspI sequences      | 15,223,791 (96.1%) | 12,649,330 (89.8%) |
| number of aligned sequences   | 10,583,896 (66.9%) | 7,431,567 (52.8%)  |
| number of informative CpGs    | 804,744            | 494,080            |
| % of CpGs within CGIs         | 80.8%              | 72.5%              |
| number of informative CGIs    | 13,280             | 9,276              |

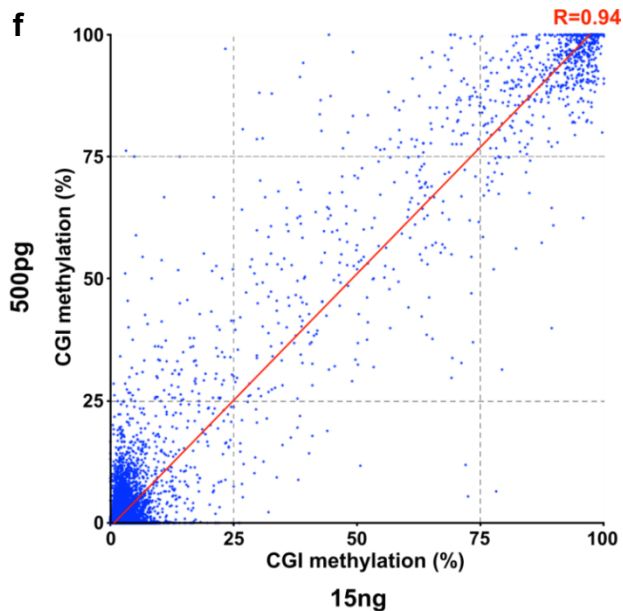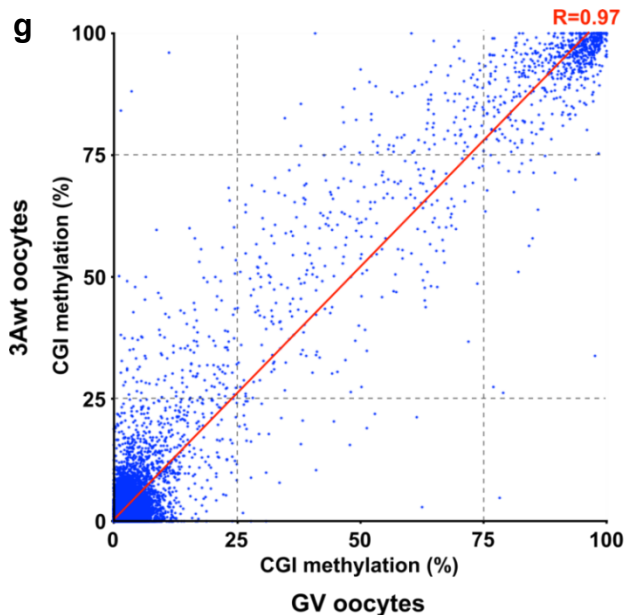

Supplementary Figure 1.

**Supplementary Figure 2: CpG methylation identified by RRBS at germline DMRs of known imprinted loci in GV oocytes (GV-Rep1) and sperm (Sperm-Rep1).** For each gene, exon organisation and location of CGIs/DMRs are given at the top. Below, the vertical grey lines represent the sequence read depth for each cytosine scored and the coloured lines the methylation level, with range from 0 to 100% from dark blue to dark red. For example, at the *Gnas* cluster, the germline DMRs at *Nespas/Gnasxl* and *Exon1A* exhibit high levels of methylation in oocytes but very low methylation in sperm, whereas the somatic DMR at *Nesp* and the constitutively unmethylated CGI at the *Gnas* promoter exhibit very low methylation in both oocytes and sperm. Similarly, the germline DMRs at *Airn* and *Grb10* show high methylation specifically in oocytes, whilst the CGIs for the *Igf2r* and *Grb10* promoters, respectively, in the same loci are unmethylated in both oocytes and sperm.

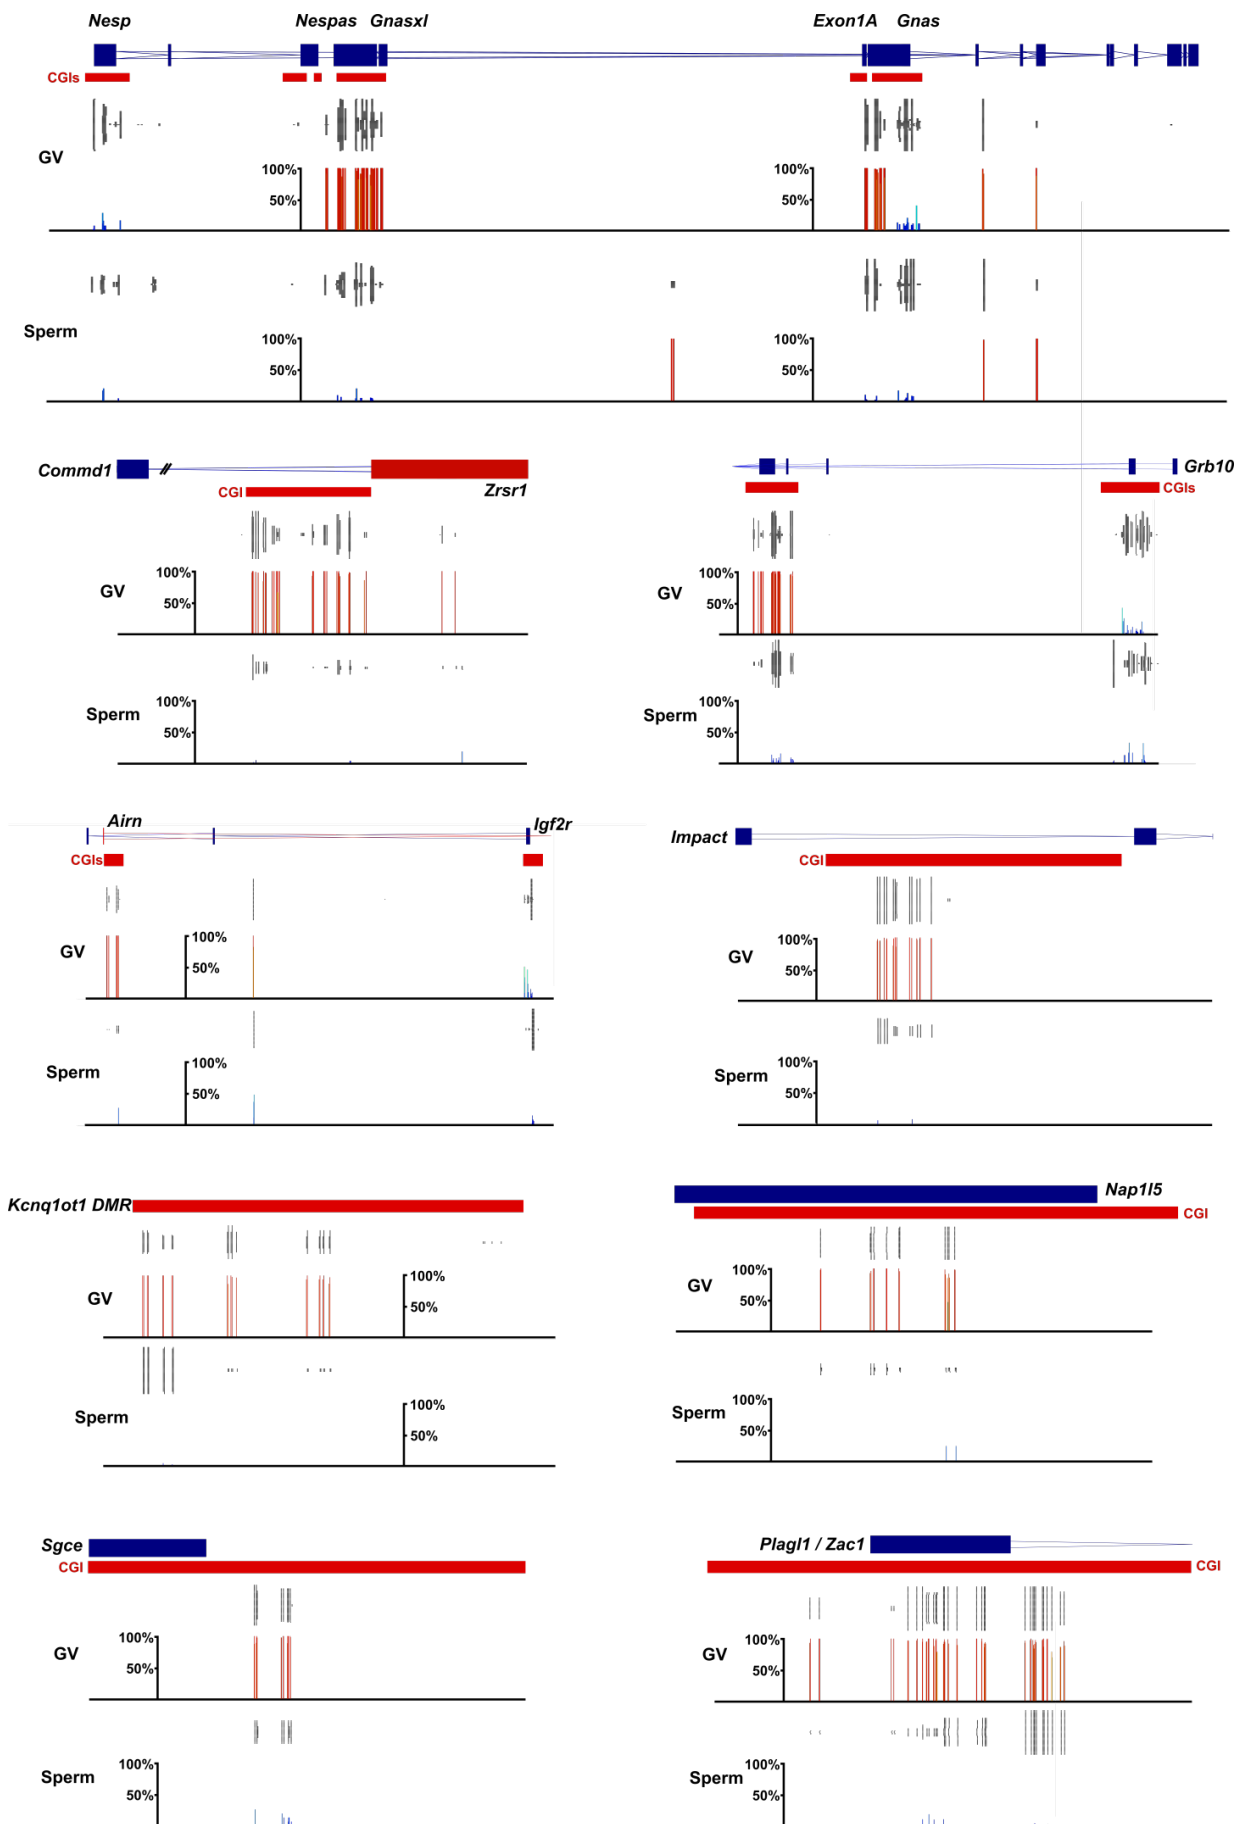

Supplementary Figure 2

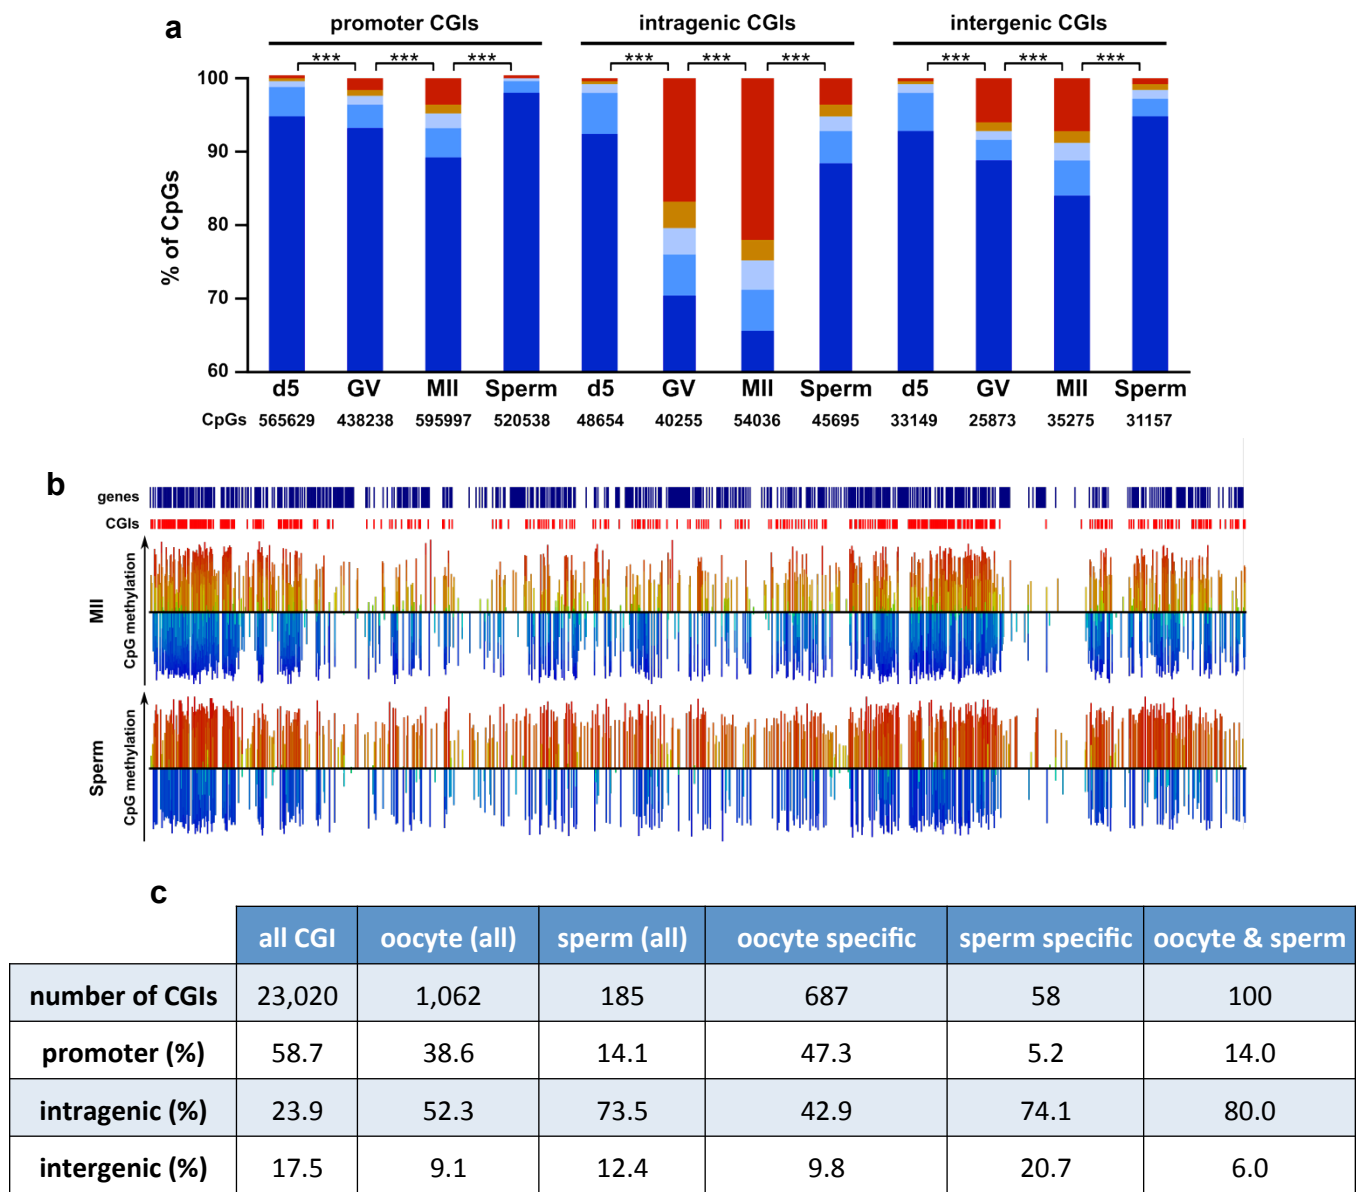

**Supplementary Figure 3: Distribution of CpG and CGI methylation.** **a**, Distribution of CpG methylation levels within CGIs classified according to their genomic location (promoter, intragenic, intergenic), in immature (d5), mature (GV and MII) oocytes and sperm. Below is indicated the number of CpGs, averaged between biological replicates, analysed in each category. This result indicates that CpGs located within CGIs are less methylated in sperm compared to mature oocytes, independent of CGI location, and that intragenic CGIs are proportionately more methylated than promoter and intergenic CGIs, in both oocytes and sperm (\*\*\*:  $p < 0.001$ ,  $\chi^2$  test) **b**, Entire chromosome 19 views of CpG methylation in MII oocytes and sperm. Data are presented as log methylated divided by unmethylated cytosines, such that green to red lines above the line approximate to degrees of methylation  $> 50\%$  and pale to dark blue lines below the line approximate to degrees of methylation  $< 50\%$ . This view reflects the higher CpG methylation level across the genome in sperm compared to MII oocytes **c**, Locations of methylated CGIs with respect to transcription units based on Ensembl, Refseq and UCSC annotations; values for promoter, intragenic and intergenic are percentage of total CGIs in each group (first row).

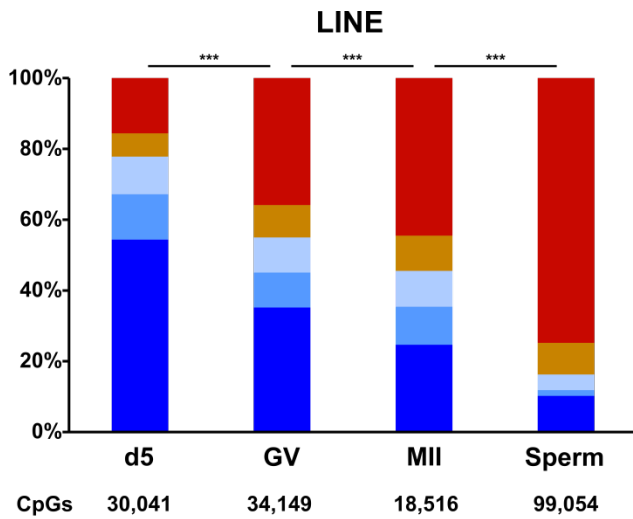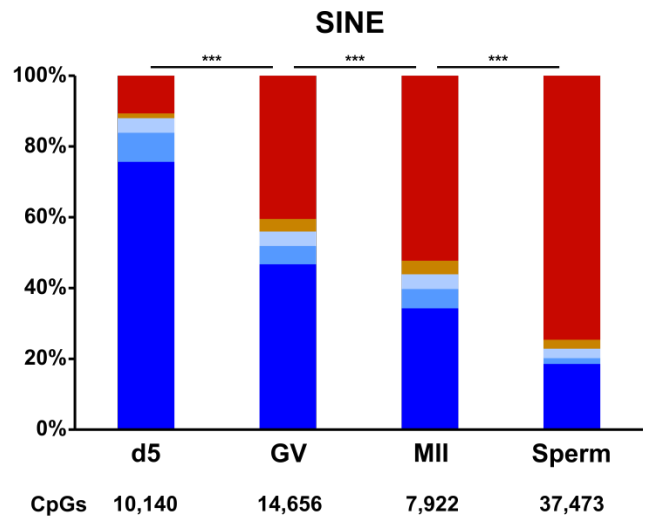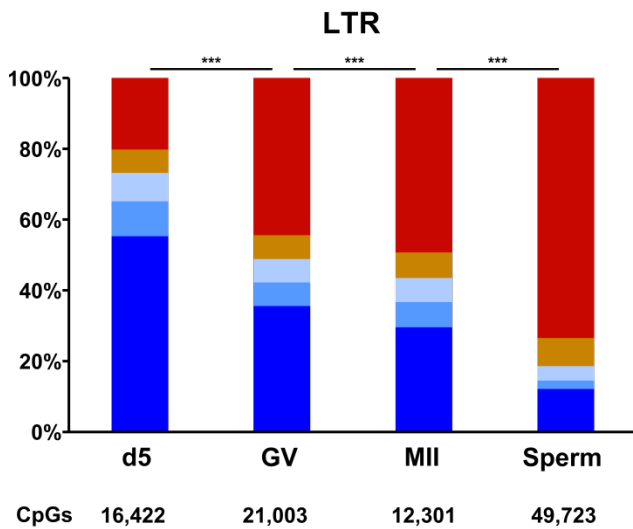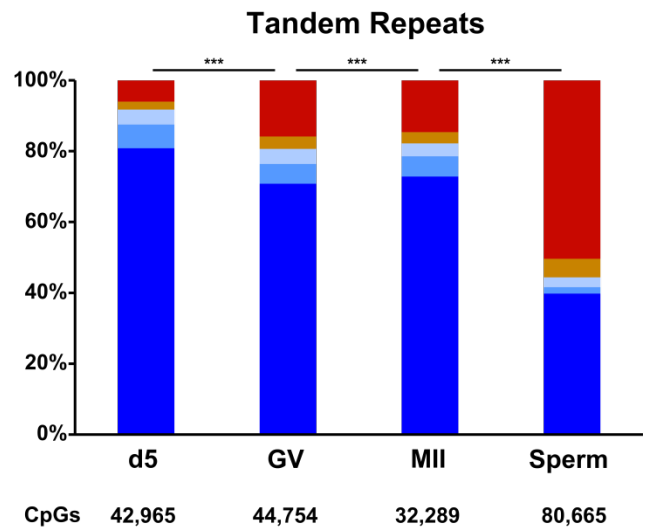

**Methylation levels**    ■ 0-20%    ■ 20-40%    ■ 40-60%    ■ 60-80%    ■ 80-100%

**Supplementary Figure 4: CpG methylation in repetitive elements.** Distribution of CpG methylation levels within repetitive elements (RE) in d5, GV, MII oocytes, and sperm, demonstrating the higher methylation of REs in sperm compared to mature oocytes. Below each graph the number of CpGs scored within the elements is given (\*\*\*:  $p < 0.001$ ,  $\chi^2$  test).

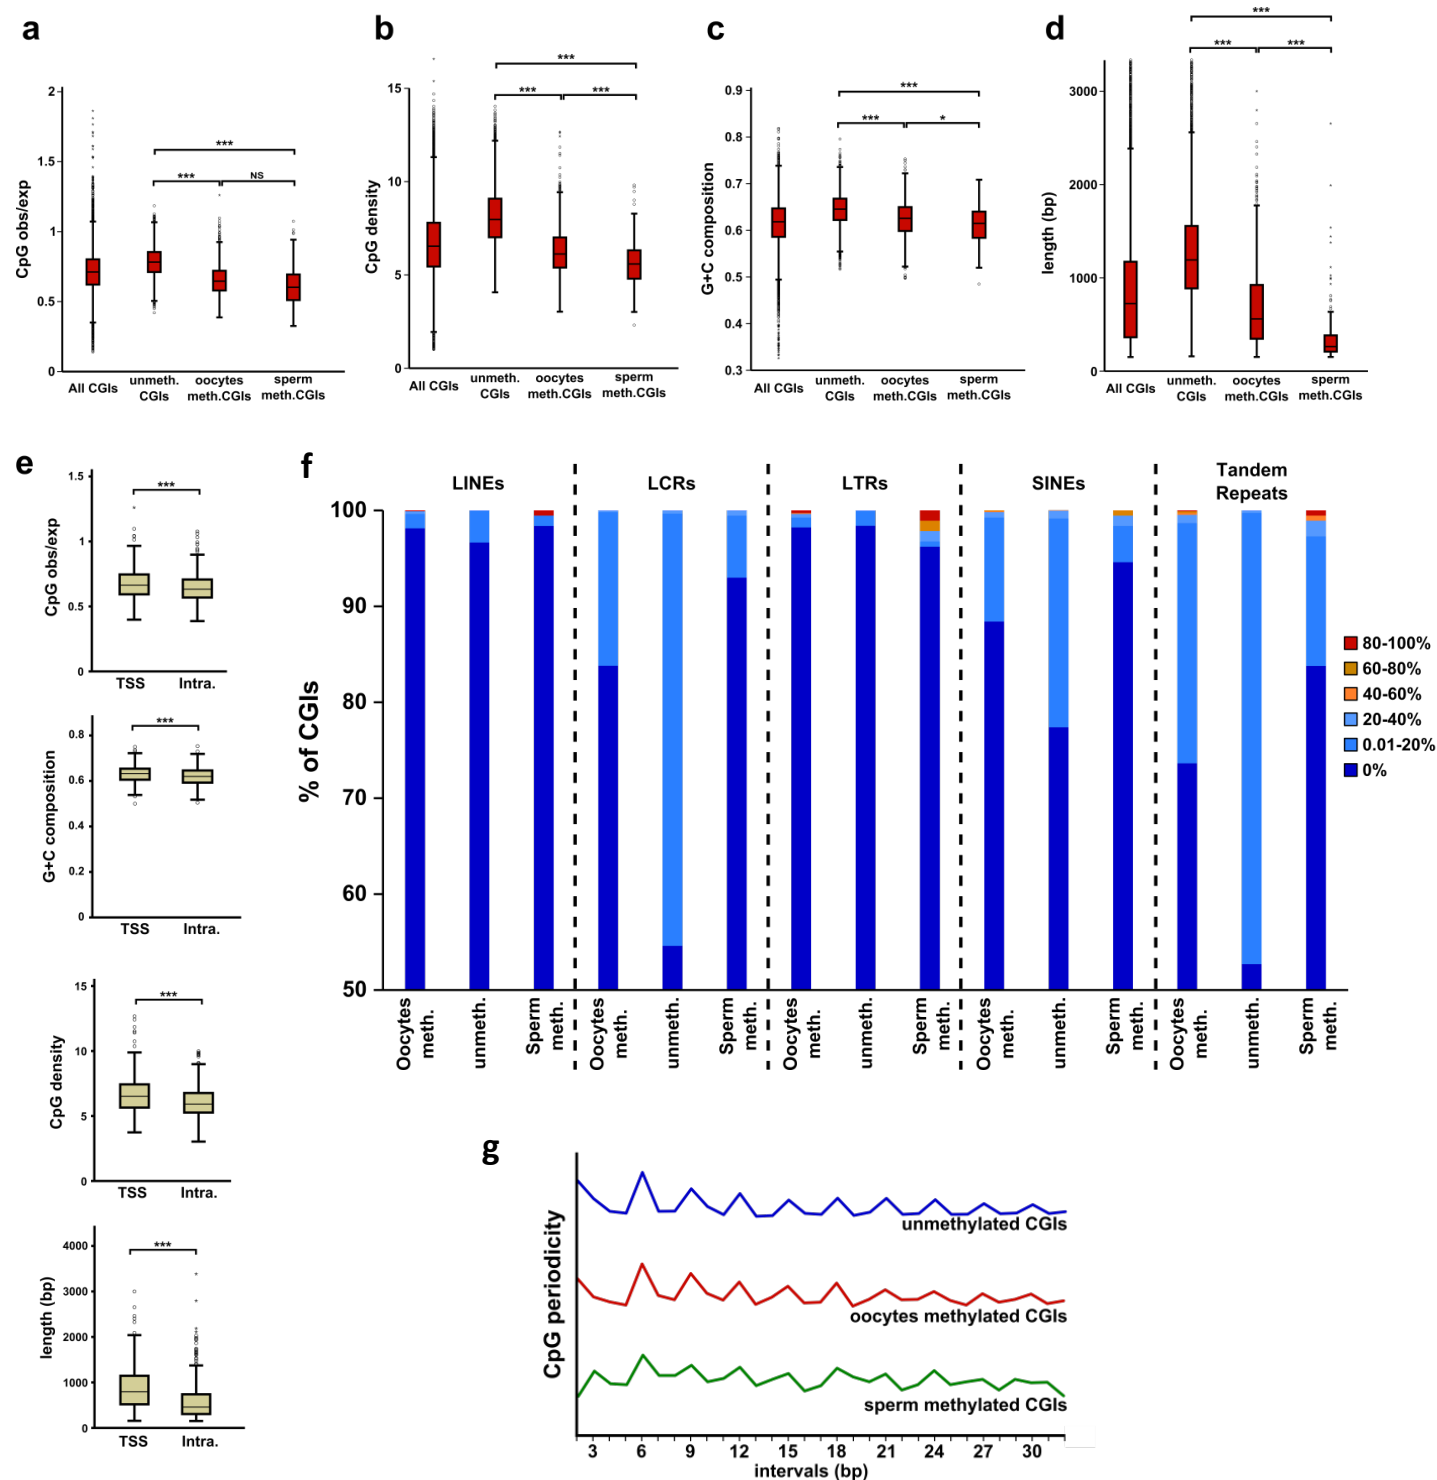

**Supplementary Figure 5: Properties of CGIs methylated in oocytes and sperm.** **a-d**, Length, CpG and GC contents and CpG density in CGIs methylated in oocytes (1062 CGIs), sperm (185 CGIs) or unmethylated in gametes (7318 CGIs). (NS: non-significant; \*\*:  $p < 0.01$ ; \*\*\*:  $p < 0.001$ , Kruskal-Wallis test) **e**, Comparison of properties of methylated CGIs in oocytes between promoter and intragenic CGIs (\*\*\*:  $p < 0.001$ , Mann-Whitney U test) **f**, Repetitive element (RE) contents of CGIs methylated in oocytes, sperm or unmethylated in the germline. The graphs present the % of the CGIs having RE contents of 0%, 0.01-20%, etc. **g**, CpG periodicity plots of CGIs methylated in oocytes, sperm or unmethylated in gametes.

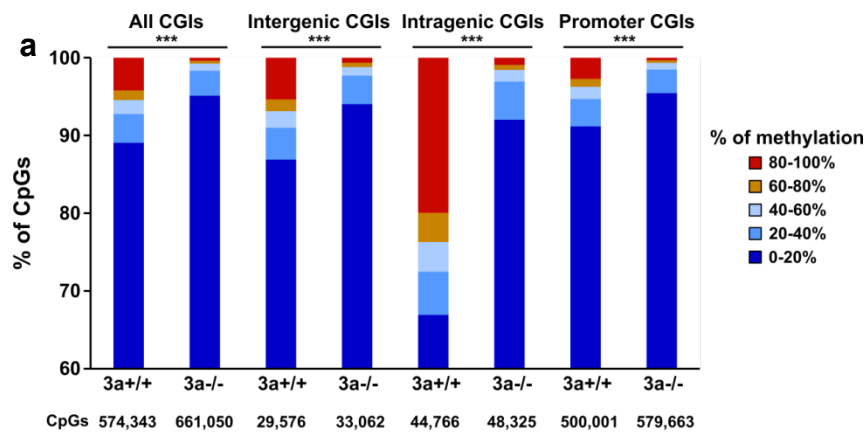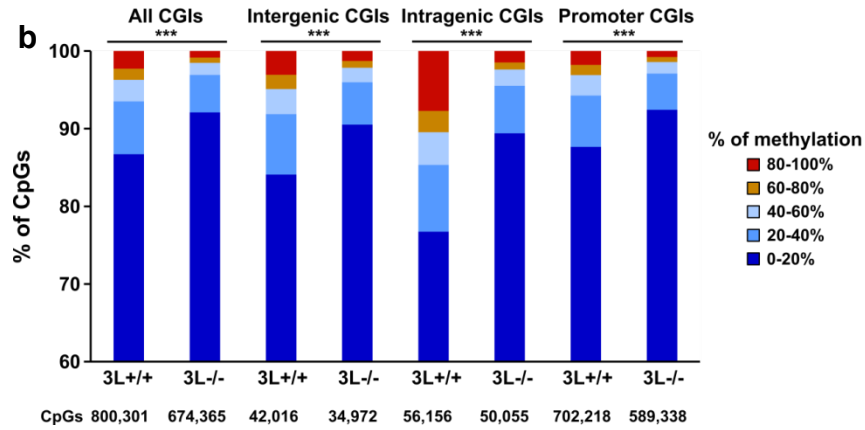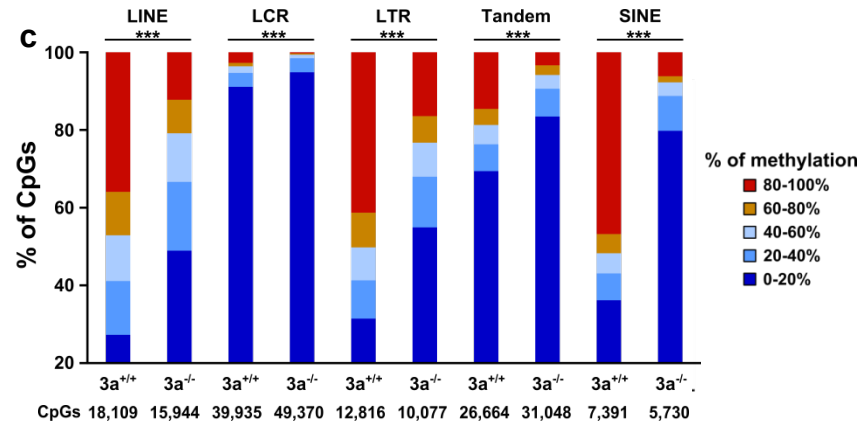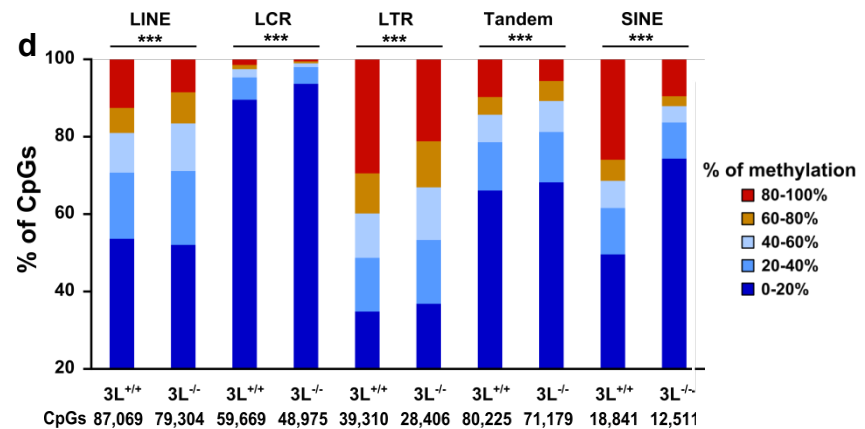

**Supplementary Figure 6: Methylation in *Dnmt3a* and *Dnmt3L* deficient oocytes.** Distribution of methylation levels of CpGs overlapping the different classes of CGIs (promoter, intragenic, intergenic) (**a,b**), or different classes of repetitive elements (RE) (**c,d**), in *Dnmt3a* wild-type (*3a+/+*) and knock-out (*3a-/-*), or *Dnmt3L* wild-type (*3L+/+*) and knock-out (*3L-/-*) GV oocytes. This analysis shows that both DNA methyltransferases have a global impact on CpG methylation, independently of their genomic context. The generally lower level of RE methylation in *Dnmt3L+/+* oocytes and the apparently ‘weaker’ effect of absence of DNMT3L might be attributed to the *Dnmt3L+/+* and *Dnmt3L-/-* oocytes being collected at a less advanced stage in comparison to *Dnmt3a+/+* and other GV oocyte samples examined by RRBS. Below is indicated the average number of CpGs analyzed in each category between biological replicates (\*\*\*:  $p < 0.001$ ,  $\chi^2$  test).



**Supplementary Figure 7: H3K4me3 analysis in growing oocytes.** **a**, Characteristics of H3K4me3 micro-ChIP-seq in oocytes. **Left**: sequencing read trend over promoters in the H3K4me3 ChIP-seq performed in oocytes (d15) compared to ES cells. ES cell H3K4me3 ChIP-seq data were obtained from public databases: (1) GSM594581 and (2) GSM535982. **Right**: H3K4me3 enrichment in promoters of low or highly transcribed genes in growing oocytes as determined by mRNA-Seq. (\*\*\*:  $p < 0.001$ , Mann-Whitney U test) **b**, Correlation between CpG methylation, mRNA expression and H3K4me3 enrichment. A region from chromosome (ch17:25,077,852-25,389,352) is displayed. Gene symbols and organization are given at the top, with genes transcribed from left to right in red and from right to left in blue. CpG methylation (GV oocytes, upper track presented as log of methylated CpGs divided by unmethylated CpGs), mRNA levels (d10 growing oocytes, middle track), and H3K4me3 enrichment (d15 growing oocytes, lower track, corrected for input background) are shown. The CGI marked in red is methylated, those marked blue are unmethylated, and those marked in grey are unknown. **c**, Identification of alternative promoters in growing oocytes. A selection of genes with a promoter methylated CGI for which an alternative upstream promoter and transcription across the CGI were inferred from mRNA-Seq in d10 oocytes is shown. For each gene, exon organization and CGI location are given on top. H3K4me3 reads (d15 growing oocytes) are represented in black. Green bars show mRNA-Seq (single-read) with reads spanning exon:intron junctions being split. Below, in blue, the reads spanning exon:intron junctions are linked by horizontal lines. In all three cases, transcription start sites upstream of the annotated promoter were inferred from the mapped mRNA-Seq reads and were found to be associated with enrichment for H3K4me3 reads.

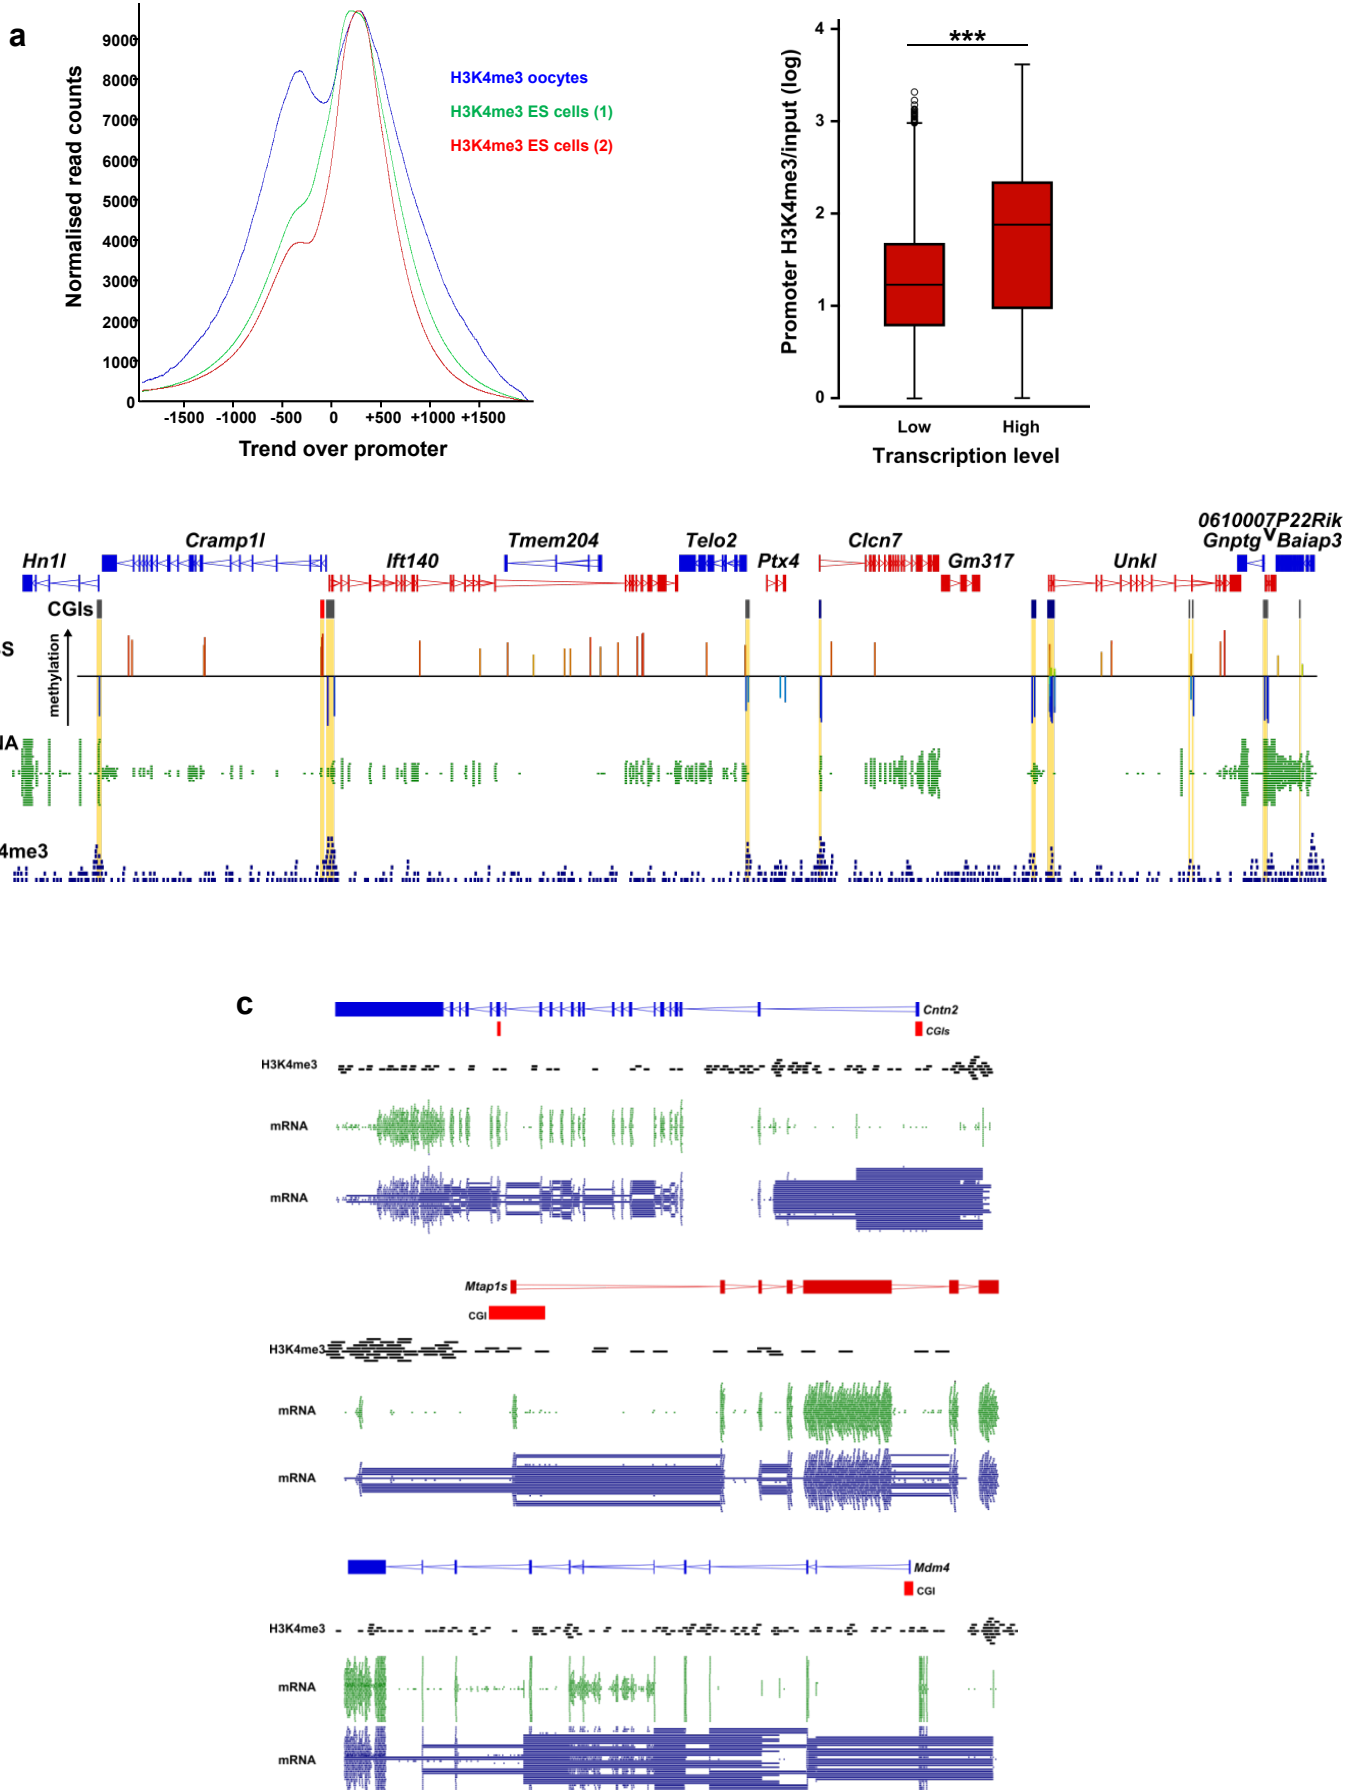

Supplementary Figure 7

**Supplementary Figure 8: Fate of gamete-derived CGI methylation in blastocysts.** **a-b**, Distribution of CpG methylation levels across the genome (**a**-left), overlapping CGIs (**a**-right), and CGI methylation levels (**b**) in immature (d5), mature (GV and MII) oocytes, sperm and E3.5 blastocysts. This analysis reflects the overall low level of methylation in blastocysts as a consequence of post-fertilisation reprogramming of the genome. The number of CpGs and CGIs analysed is indicated in Suppl. Fig. 1b (\*\*\*:  $p < 0.001$ ,  $\chi^2$  test). **c**, Comparison of the distribution of CGI methylation in blastocysts between all CGIs ( $n=13875$ ) and the CGIs also methylated in mature oocytes ( $n=890$ ) (\*\*\*:  $p < 0.001$ ,  $\chi^2$  test). **d**, Distribution of CGI methylation level in blastocysts according to their methylation level in gametes (left, MII oocytes v. blastocyst comparison; right, sperm v. blastocyst comparison) showing that the majority of CGIs methylated between 25-40% in blastocysts are fully methylated in MII oocytes (\*\*\*:  $p < 0.001$ ,  $\chi^2$  test) . **e**, Genomic localization of CGIs methylated in MII oocytes (75-100%) classified according to their methylation level in blastocysts (the number of CGIs in each class is given in the bottom row of the table in **d**). **f**, CpG and GC contents, CpG density, length and CpG periodicity of CGIs methylated in MII oocytes (75-100%) classified according to their methylation level in blastocysts (\*  $p < 0.05$ ; \*\*  $p < 0.01$ ; \*\*\*  $p < 0.001$ , Kruskal-Wallis test). All four classes of CGI have an underlying 3bp periodicity, the more prominent peaks at 6 and 12bp in the 60-75% methylated category may be a reflection of the much lower number of CGIs in this group ( $n=11$ ). **g**, Bisulphite sequencing in GV oocytes, sperm and E3.5 blastocysts of three CGIs identified by RRBS as examples of CGIs *de novo* methylated in blastocysts. Open circles represent unmethylated CpGs and dark circles methylated CpGs.

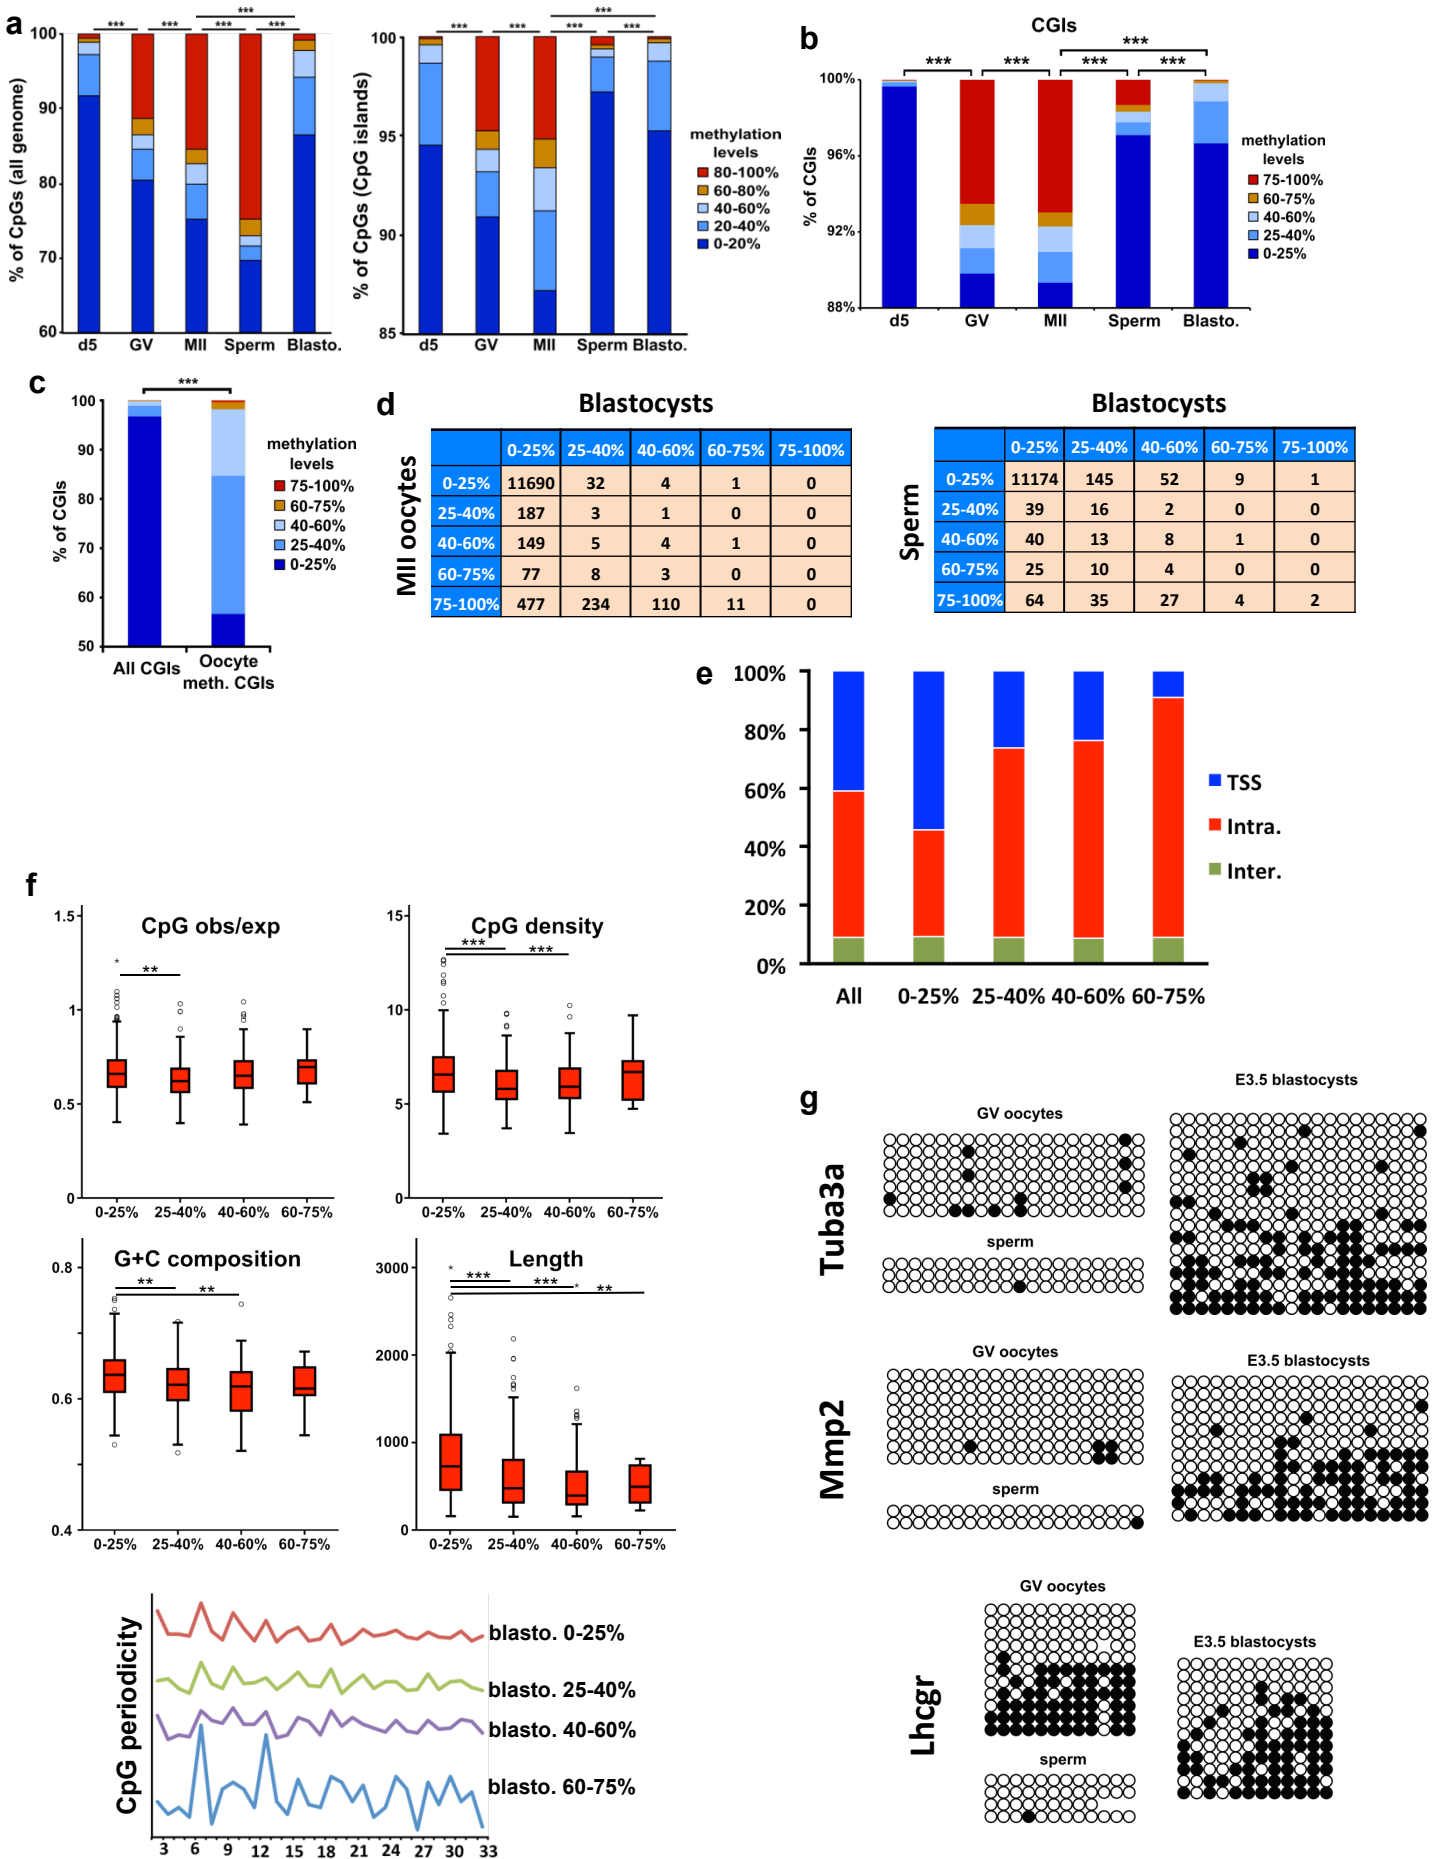

Supplementary Figure 8

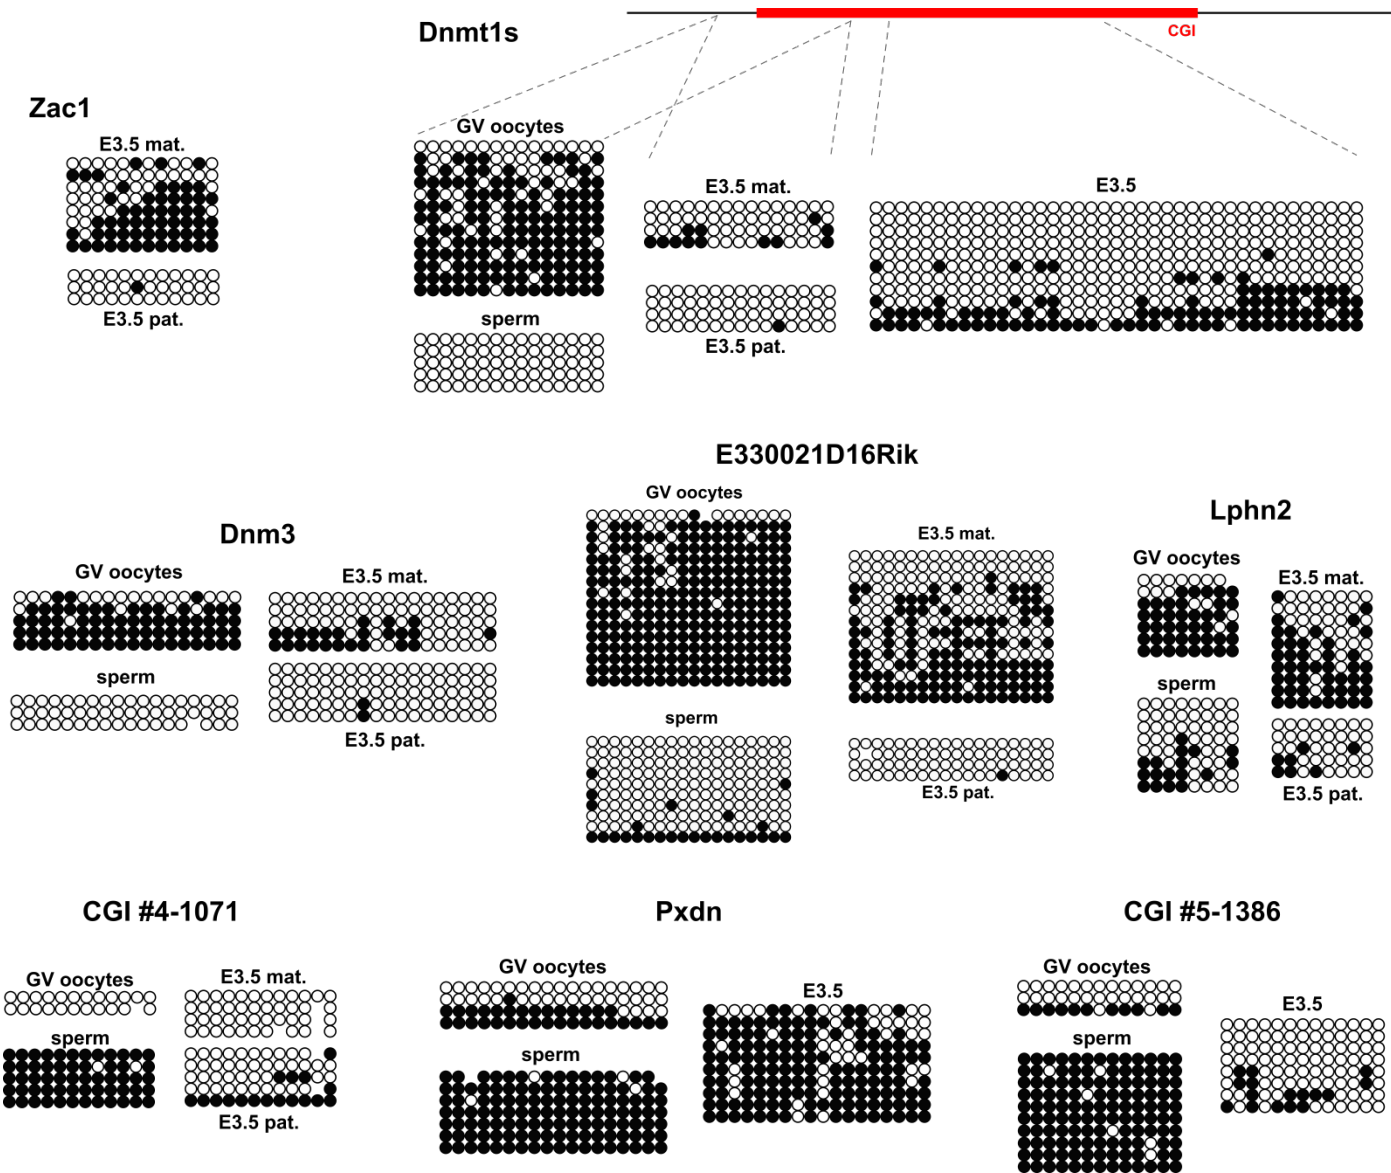

**Supplementary Figure 9: Parental-allele methylation analysis in blastocysts of CGIs methylated in gametes.** Bisulphite sequencing in GV oocytes, sperm and hybrid E3.5 blastocysts (C57BL/6J x CAST/Ei) of seven CGIs identified by RRBS as methylated in oocytes or sperm and presenting signs of methylation in blastocysts. When possible methylation in blastocysts was discriminated between parental alleles using SNPs between C57BL/6J and CAST/Ei strains. Bisulphite sequencing of the known maternal germline DMR of the imprinted locus *Zac1* is provided as a control for allele discrimination. Open circles represent unmethylated CpGs and dark circles methylated CpGs.

**Supplementary Table 2: CGIs called methylated in MII but not GV oocytes**

| CGI-ID   | Position                  | Name           |
|----------|---------------------------|----------------|
| #1-53    | Chr1:16082890-16083575    | 4930444P10Rik  |
| #1-500   | Chr1:88199490-88200753    | B3gnt7         |
| #1-529   | Chr1:89405790-89407455    | Ngef           |
| #1-854   | Chr1:154246932-154247827  | Git25d2        |
| #2-94    | Chr2:18602648-18602969    | Bmi1           |
| #2-112   | Chr2:20441109-20441627    | Etl4           |
| #2-145   | Chr2:24909714-24910543    | Nelf           |
| #2-1124  | Chr2:130461621-130461897  | Prosapip1      |
| #2-1221  | Chr2:146337107-146338192  | A230067G21Rik  |
| #2-1387  | Chr2:155644583-155645132  | BC029722       |
| #3-14    | Chr3:8462705-8463080      | AC130716.3-1   |
| #3-117   | Chr3:32607238-32608341    | Actl6a         |
| #3-233   | Chr3:54589939-54590325    | Smad9          |
| #3-574   | Chr3:95491434-95492179    | Adamtsl4       |
| #3-788   | Chr3:116125897-116127278  | Cdc14a         |
| #4-507   | Chr4:100240600-100240790  | RP23-309M8.3   |
| #4-818   | Chr4:125735293-125736156  | 1810007P19Rik  |
| #4-1102  | Chr4:135553348-135553552  | RP23-161N17.11 |
| #4-1151  | Chr4:137285069-137285413  | Rap1gap        |
| #4-1266  | Chr4:141794251-141795651  | 9030409G11Rik  |
| #4-1402  | Chr4:151489885-151490406  | Tnfrsf25       |
| #5-273   | Chr5:36924014-36925294    | Tbc1d14        |
| #5-327   | Chr5:44491690-44492943    | Prom1          |
| #5-996   | Chr5:121056572-121056872  | lqcd           |
| #5-1474  | Chr5:144131518-144132343  | Grid2ip        |
| #5-1478  | Chr5:144148813-144149306  | Grid2ip        |
| #6-55    | Chr6:17230862-17231594    | Cav2           |
| #6-101   | Chr6:28781396-28784050    | Snd1           |
| #6-211   | Chr6:40275285-40275830    | Agk            |
| #6-239   | Chr6:47892689-47893724    | RP23-14P17.3   |
| #6-274   | Chr6:50546259-50547093    | 4921507P07Rik  |
| #6-503   | Chr6:83958370-83959094    | Dysf           |
| #6-637   | Chr6:93628414-93629018    | Magi1          |
| #6-716   | Chr6:113232225-113232817  | Cpne9          |
| #6-717   | Chr6:113233064-113233468  | Cpne9          |
| #7-48    | Chr7:4635940-4636155      | 1500019G21Rik  |
| #7-110   | Chr7:7230439-7231264      | null           |
| #7-250   | Chr7:19742677-19743120    | Gipr           |
| #7-887   | Chr7:52970340-52970892    | Sphk2          |
| #7-1149  | Chr7:88049665-88050099    | Nmb            |
| #7-1529  | Chr7:134164407-134164943  | null           |
| #7-1816  | Chr7:152392122-152392463  | null           |
| #8-2     | Chr8:3278976-3279870      | Insr           |
| #8-172   | Chr8:26628949-26630497    | Fgfr1          |
| #8-437   | Chr8:72853777-72855732    | Gdf1           |
| #8-693   | Chr8:87225465-87225908    | Lyl1           |
| #8-699   | Chr8:87295836-87296350    | Nfix           |
| #8-712   | Chr8:87417301-87417693    | Gcdh           |
| #8-927   | Chr8:108137095-108137462  | 2310066E14Rik  |
| #8-1191  | Chr8:124276786-124277800  | Jph3           |
| #9-1008  | Chr9:108017188-108018041  | Bsn            |
| #9-1030  | Chr9:108499246-108500191  | 4933406E20Rik  |
| #10-47   | Chr10:11211772-11211987   | null           |
| #10-366  | Chr10:61440407-61442367   | Col13a1        |
| #10-576  | Chr10:79433392-79434468   | Grin3b         |
| #10-1085 | Chr10:126527634-126529266 | Agap2          |
| #11-230  | Chr11:30654829-30655552   | RP23-358M10.3  |
| #11-356  | Chr11:50048163-50048348   | Mgat4b         |
| #11-889  | Chr11:78156836-78157808   | Unc119         |
| #11-1056 | Chr11:87983090-87983692   | Cuedc1         |
| #11-1062 | Chr11:88162314-88162477   | Msi2           |
| #11-1130 | Chr11:95084590-95085222   | null           |
| #11-1768 | Chr11:117734158-117734890 | Tha1           |
| #12-306  | Chr12:58676819-58677861   | 4921506M07Rik  |
| #12-351  | Chr12:70891459-70892387   | Cdkl1          |
| #12-463  | Chr12:81535706-81538109   | Wdr22          |
| #13-289  | Chr13:44964945-44965478   | Jarid2         |
| #13-347  | Chr13:49515995-49517368   | Ippk           |
| #13-864  | Chr13:113779672-113780228 | Ccno           |
| #13-897  | Chr13:118009260-118010149 | Emb            |
| #14-128  | Chr14:31362166-31363276   | Tkt            |
| #15-533  | Chr15:83180100-83181117   | Arfgap3        |
| #15-551  | Chr15:84276205-84277179   | 1810041L15Rik  |
| #15-749  | Chr15:98439164-98440574   | null           |
| #16-164  | Chr16:18836548-18837113   | 2510002D24Rik  |
| #16-592  | Chr16:93919450-93920119   | Cldn14         |
| #17-474  | Chr17:34087856-34088649   | B3gal4         |
| #17-562  | Chr17:35836836-35838077   | Ddr1           |
| #17-938  | Chr17:72131437-72132831   | Clip4          |
| #18-211  | Chr18:36829685-36830101   | Sra1           |
| #18-321  | Chr18:38791106-38791889   | Arhgap26       |
| #18-457  | Chr18:61866679-61867649   | Pcyox1l        |
| #18-489  | Chr18:65243177-65243938   | Nedd4l         |
| #18-589  | Chr18:76320476-76321086   | null           |
| #18-637  | Chr18:80432955-80433717   | null           |
| #19-238  | Chr19:10115401-10117049   | Fads3          |
| #X-25    | ChrX:7455155-7456002      | Pim2           |
| #X-78    | ChrX:13063026-13064168    | Nyx            |
| #X-507   | ChrX:166427875-166428454  | Mid1           |

**Supplementary Table 3: EpiGRAPH analysis results. (1/2)**

**List of attributes found significantly different (Bonferroni)  
between methylated and unmethylated CGIs in matures oocytes**

| Rank | Variable Name                                | Attribute Group Name    | Unmethylated CGIs | Methylated CGIs |
|------|----------------------------------------------|-------------------------|-------------------|-----------------|
| 1    | overlapAverageSize                           | Chromosome Organisation | 10705595.19       | 6461661.881     |
| 2    | Pat AA skew                                  | DNA Sequence            | 0.955069816       | 0.625072647     |
| 3    | Pat AA std                                   | DNA Sequence            | 0.063486415       | 0.055676137     |
| 4    | Pat AT skew                                  | DNA Sequence            | 1.060542974       | 0.657286929     |
| 5    | Pat CC freq                                  | DNA Sequence            | 0.221270612       | 0.206414565     |
| 6    | Pat CC std                                   | DNA Sequence            | 0.083932335       | 0.077408841     |
| 7    | Pat CG freq                                  | DNA Sequence            | 0.079160103       | 0.063244462     |
| 8    | Pat CG std                                   | DNA Sequence            | 0.050575328       | 0.040954385     |
| 9    | Pat GC std                                   | DNA Sequence            | 0.052859708       | 0.048111884     |
| 10   | Pat TA skew                                  | DNA Sequence            | 1.063245727       | 0.787711653     |
| 11   | Pat CCGG freq                                | DNA Sequence            | 0.021659431       | 0.016151509     |
| 12   | Pat CCGA freq                                | DNA Sequence            | 0.007996026       | 0.006398444     |
| 13   | Pat CCGC freq                                | DNA Sequence            | 0.023424418       | 0.016408833     |
| 14   | Pat CCGG freq                                | DNA Sequence            | 0.010874528       | 0.008504384     |
| 15   | Pat CGAG freq                                | DNA Sequence            | 0.009955094       | 0.008218715     |
| 16   | Pat CGCC freq                                | DNA Sequence            | 0.021591365       | 0.015001292     |
| 17   | Pat CGCG freq                                | DNA Sequence            | 0.008801869       | 0.004856313     |
| 18   | Pat CGGA freq                                | DNA Sequence            | 0.010645563       | 0.008428885     |
| 19   | Pat CGGC freq                                | DNA Sequence            | 0.019376091       | 0.014305246     |
| 20   | Pat CGTC freq                                | DNA Sequence            | 0.006285175       | 0.005296771     |
| 21   | Pat GCCC freq                                | DNA Sequence            | 0.023043787       | 0.020259311     |
| 22   | Pat GCGA freq                                | DNA Sequence            | 0.00791568        | 0.006414888     |
| 23   | Pat GCGC freq                                | DNA Sequence            | 0.010591224       | 0.007348892     |
| 24   | Pat TAAA freq                                | DNA Sequence            | 0.002946379       | 0.002176811     |
| 25   | Pat TTTA freq                                | DNA Sequence            | 0.00125891        | 0.000961393     |
| 26   | Pat plusT std                                | DNA Sequence            | 0.081247266       | 0.074547681     |
| 27   | CpG content                                  | DNA Sequence            | 0.079075993       | 0.063108689     |
| 28   | CpG obs vs exp ratio                         | DNA Sequence            | 0.767805874       | 0.654946153     |
| 29   | CpG vs TpG v CpA ratio                       | DNA Sequence            | 0.082466959       | 0.069406064     |
| 30   | GC content                                   | DNA Sequence            | 0.642435855       | 0.623938512     |
| 31   | length                                       | DNA Sequence            | 1201.369          | 688.275         |
| 32   | overlapAverageSize                           | DNA Sequence            | 1791.370683       | 681.032777      |
| 33   | rise skew                                    | DNA Structure           | 0.016095465       | -0.055183519    |
| 34   | roll std                                     | DNA Structure           | 0.759912131       | 0.73350349      |
| 35   | slide std                                    | DNA Structure           | 0.275075275       | 0.249973987     |
| 36   | overlapRegionsCount                          | Repetitive DNA          | 0.964534924       | 0.583640044     |
| 37   | overlapTotalLength                           | Repetitive DNA          | 52.25925152       | 37.06730018     |
| 38   | repClass Low complexity overlapRegionsCount  | Repetitive DNA          | 0.469526445       | 0.186778981     |
| 39   | repClass Low complexity overlapTotalLength   | Repetitive DNA          | 23.45723149       | 8.619673696     |
| 40   | repClass Simple repeat overlapTotalLength    | Repetitive DNA          | 16.34739213       | 10.24694697     |
| 41   | repFamily Low complexity overlapRegionsCount | Repetitive DNA          | 0.469526445       | 0.186778981     |
| 42   | repFamily Low complexity overlapTotalLength  | Repetitive DNA          | 23.45723149       | 8.619673696     |
| 43   | repFamily Simple repeat overlapTotalLength   | Repetitive DNA          | 16.34739213       | 10.24694697     |
| 44   | Pat CA freq                                  | DNA Sequence            | 0.120096199       | 0.140957304     |
| 45   | overlapRegionsCount                          | Chromosome Organisation | 1.115281041       | 2.18157639      |
| 46   | overlapRegionsCount                          | DNA Sequence            | 1.115281041       | 2.18157639      |
| 47   | rise                                         | DNA Structure           | 3.239647495       | 3.243896889     |
| 48   | Pat AG freq                                  | DNA Sequence            | 0.14283668        | 0.150035999     |
| 49   | Pat AGCA freq                                | DNA Sequence            | 0.009047981       | 0.011658973     |
| 50   | Pat GGCA freq                                | DNA Sequence            | 0.010662241       | 0.013244325     |
| 51   | Pat CAGC freq                                | DNA Sequence            | 0.017620536       | 0.021077014     |
| 52   | Pat ACAG freq                                | DNA Sequence            | 0.007769387       | 0.009637252     |
| 53   | Pat CACA freq                                | DNA Sequence            | 0.007901329       | 0.0102523       |
| 54   | Pat AC freq                                  | DNA Sequence            | 0.091446429       | 0.098133875     |
| 55   | Pat CATC freq                                | DNA Sequence            | 0.005660264       | 0.007796345     |
| 56   | Pat CCAG freq                                | DNA Sequence            | 0.016639784       | 0.019102656     |
| 57   | Pat CTGC freq                                | DNA Sequence            | 0.017584873       | 0.020841528     |
| 58   | Pat ATGC freq                                | DNA Sequence            | 0.004139499       | 0.005701411     |
| 59   | Pat ACCA freq                                | DNA Sequence            | 0.005804815       | 0.007339142     |
| 60   | repClass Simple repeat overlapRegionsCount   | Repetitive DNA          | 0.317235256       | 0.208833879     |
| 61   | repFamily Simple repeat overlapRegionsCount  | Repetitive DNA          | 0.317235256       | 0.208833879     |
| 62   | Pat ACTG freq                                | DNA Sequence            | 0.006553573       | 0.008121666     |
| 63   | Pat CCCC freq                                | DNA Sequence            | 0.022613672       | 0.019456372     |
| 64   | Pat plusA std                                | DNA Sequence            | 0.080005144       | 0.073808545     |
| 65   | Pat CCAC freq                                | DNA Sequence            | 0.01202238        | 0.014020661     |
| 66   | Pat CAGG freq                                | DNA Sequence            | 0.016043236       | 0.018243793     |
| 67   | Pat AAAA freq                                | DNA Sequence            | 0.005543419       | 0.004309761     |
| 68   | roll skew                                    | DNA Structure           | 0.497585811       | 0.430738767     |
| 69   | Pat AT freq                                  | DNA Sequence            | 0.023468181       | 0.026976425     |
| 70   | Pat CGAC freq                                | DNA Sequence            | 0.005373276       | 0.004546125     |
| 71   | Pat plusG std                                | DNA Sequence            | 0.100160351       | 0.093670045     |
| 72   | Pat plusG freq                               | DNA Sequence            | 0.3230947         | 0.310043947     |
| 73   | G content                                    | DNA Sequence            | 0.3230947         | 0.310043947     |
| 74   | Pat GCAC freq                                | DNA Sequence            | 0.009402311       | 0.011343088     |
| 75   | Pat TGCA freq                                | DNA Sequence            | 0.003953584       | 0.00512498      |
| 76   | overlapAverageSize                           | Repetitive DNA          | 92.22315864       | 67.81075747     |
| 77   | Pat plusC std                                | DNA Sequence            | 0.099238371       | 0.092018063     |
| 78   | gieStain gneg overlapRegionsCount            | Chromosome Organisation | 0.535981578       | 1.165692885     |
| 79   | Pat GGGA freq                                | DNA Sequence            | 0.016798222       | 0.014991824     |
| 80   | Pat CATG freq                                | DNA Sequence            | 0.002137313       | 0.003168427     |

**Supplementary Table 3: EpiGRAPH analysis results. (2/2)**

**List of attributes found significantly different (Bonferroni)  
between methylated and unmethylated CGIs in matures oocytes**

| Rank | Variable Name                     | Attribute Group Name | Unmethylated CGIs | Methylated CGIs |
|------|-----------------------------------|----------------------|-------------------|-----------------|
| 81   | Pat plusT skew                    | DNA Sequence         | 0.481806397       | 0.258310883     |
| 82   | Pat GCCA freq                     | DNA Sequence         | 0.012036689       | 0.013984565     |
| 83   | Pat ACAT freq                     | DNA Sequence         | 0.002526196       | 0.003743113     |
| 84   | Pat plusA freq                    | DNA Sequence         | 0.179310416       | 0.1887325       |
| 85   | Pat CTA A freq                    | DNA Sequence         | 0.002882143       | 0.002400916     |
| 86   | tilt                              | DNA Structure        | 0.094447479       | 0.086074636     |
| 87   | Pat GC freq                       | DNA Sequence         | 0.105110503       | 0.099703355     |
| 88   | Pat plusA skew                    | DNA Sequence         | 0.451252956       | 0.255388923     |
| 89   | Pat TA std                        | DNA Sequence         | 0.023764427       | 0.021898814     |
| 90   | Pat plusT freq                    | DNA Sequence         | 0.178253729       | 0.178328988     |
| 91   | Pat TCCA freq                     | DNA Sequence         | 0.00870772        | 0.01005179      |
| 92   | Pat AATA freq                     | DNA Sequence         | 0.001868996       | 0.001564623     |
| 93   | Pat AATT freq                     | DNA Sequence         | 0.001148681       | 0.000969246     |
| 94   | Pat ATGA freq                     | DNA Sequence         | 0.002950817       | 0.004179948     |
| 95   | Pat AAAT freq                     | DNA Sequence         | 0.003139183       | 0.002678546     |
| 96   | Pat ATTA freq                     | DNA Sequence         | 0.001436496       | 0.001281888     |
| 97   | Pat CTCA freq                     | DNA Sequence         | 0.008387812       | 0.00972922      |
| 98   | Pat ATAA freq                     | DNA Sequence         | 0.001789872       | 0.001512015     |
| 99   | Pat CAGA freq                     | DNA Sequence         | 0.009901594       | 0.011217872     |
| 100  | Pat ACGC freq                     | DNA Sequence         | 0.006914657       | 0.006136754     |
| 101  | tilt skew                         | DNA Structure        | 0.14849511        | 0.189319768     |
| 102  | Pat GTTA freq                     | DNA Sequence         | 0.002183103       | 0.001942821     |
| 103  | slide                             | DNA Structure        | -0.332162756      | -0.319615375    |
| 104  | Pat AGCG freq                     | DNA Sequence         | 0.010963887       | 0.009995597     |
| 105  | Pat GAAA freq                     | DNA Sequence         | 0.006524919       | 0.005753072     |
| 106  | Pat CACC freq                     | DNA Sequence         | 0.012434776       | 0.013930578     |
| 107  | Pat CTAG freq                     | DNA Sequence         | 0.002670177       | 0.002328242     |
| 108  | slide skew                        | DNA Structure        | -1.73035479       | -1.592463996    |
| 109  | Pat CGAA freq                     | DNA Sequence         | 0.00375897        | 0.003354616     |
| 110  | Pat CTCC freq                     | DNA Sequence         | 0.020551259       | 0.019032286     |
| 111  | SASA skew                         | DNA Structure        | -0.048356662      | -0.024561818    |
| 112  | Pat AGTG freq                     | DNA Sequence         | 0.007021139       | 0.008182328     |
| 113  | repClass SINE overlapTotalLength  | Repetitive DNA       | 9.794820036       | 6.757944301     |
| 114  | twist skew                        | DNA Structure        | -0.333170286      | -0.282763399    |
| 115  | twist std                         | DNA Structure        | 0.909709936       | 0.892561103     |
| 116  | Pat TATA freq                     | DNA Sequence         | 0.000485684       | 0.000491342     |
| 117  | repClass SINE overlapRegionsCount | Repetitive DNA       | 0.138495281       | 0.099704182     |
| 118  | Pat AAAG freq                     | DNA Sequence         | 0.006873441       | 0.006293014     |
| 119  | Pat GACC freq                     | DNA Sequence         | 0.00943862        | 0.008752898     |
| 120  | Pat ATGG freq                     | DNA Sequence         | 0.005362876       | 0.006386437     |
| 121  | Pat GGCC freq                     | DNA Sequence         | 0.010378475       | 0.009544409     |
| 122  | Pat CA skew                       | DNA Sequence         | 0.202998138       | 0.063710259     |
| 123  | Pat GACA freq                     | DNA Sequence         | 0.006430135       | 0.007473398     |
| 124  | Pat ACCG freq                     | DNA Sequence         | 0.007112833       | 0.006672139     |
| 125  | Pat AAAC freq                     | DNA Sequence         | 0.004736722       | 0.004321643     |
| 126  | Pat CACG freq                     | DNA Sequence         | 0.007186778       | 0.008267702     |
| 127  | Pat ATCA freq                     | DNA Sequence         | 0.002878723       | 0.003695563     |
| 128  | Pat AGCT freq                     | DNA Sequence         | 0.004947546       | 0.005751943     |
| 129  | shift skew                        | DNA Structure        | 0.41544756        | 0.37805301      |
| 130  | twist                             | DNA Structure        | 35.07221165       | 35.03861044     |
| 131  | Pat GTGA freq                     | DNA Sequence         | 0.00645994        | 0.007453373     |
| 132  | Pat AATC freq                     | DNA Sequence         | 0.003016919       | 0.002785156     |
| 133  | Pat ACAC freq                     | DNA Sequence         | 0.006651948       | 0.00779771      |
| 134  | Pat AG skew                       | DNA Sequence         | 0.142491037       | 0.013093388     |
| 135  | Pat CA std                        | DNA Sequence         | 0.047198052       | 0.046493703     |
| 136  | Pat CTGA freq                     | DNA Sequence         | 0.008107034       | 0.00905534      |
| 137  | Pat ACCT freq                     | DNA Sequence         | 0.007197272       | 0.007944991     |
| 138  | SASA                              | DNA Structure        | 0.423686073       | 0.417767217     |
| 139  | Pat AC skew                       | DNA Sequence         | 0.360008131       | 0.235919926     |
| 140  | Pat TCGA freq                     | DNA Sequence         | 0.001413107       | 0.001439582     |
| 141  | Pat TGAA freq                     | DNA Sequence         | 0.004469861       | 0.005352819     |
| 142  | Pat AACG freq                     | DNA Sequence         | 0.003222458       | 0.002999586     |
| 143  | Pat AG std                        | DNA Sequence         | 0.048149472       | 0.0470305       |
| 144  | Pat GGAC freq                     | DNA Sequence         | 0.01092201        | 0.010373888     |



## **Supplementary Table 4**

### **Bisulphite Sequencing PCR primers**

| <b>CpG island</b> | <b>Forward</b>                                         | <b>Reverse</b>                                    |
|-------------------|--------------------------------------------------------|---------------------------------------------------|
| Syt2              | ATTTTTTAGAGATTTGGTGTAGTGGTT                            | ATCATTTCAAAAATTACAAACTAAAC                        |
| Tuba3a            | GAGGAAGTTTTAGTTTTAGAGGAGA                              | CCAATCAAAAAATACCAACTACA                           |
| Mmp2              | GGGATTGTTAGGATTTGTAAGTATT                              | ACCCAACAAACAACACAAAAC                             |
| Lhcgr             | TGTTTTTAGTAATGGGGTTAATAT                               | TACTCTCCAAAATTATCAAAATC                           |
| Zac1              | TGGGTGCCCCAGTTGCAGCCAGAGATGCAG                         | CAAAAAACACAAATCACCTCTTC                           |
| Dnmt1s            | CAGAGTTTTTTTGATAGTTTTAGGAT<br>GAGGGTTGATTTTTTTGTTTTTTA | AATATACAAAAATACCCCTCTCCC<br>TCCCCACTCTTACCCTATATA |
| Dnm3              | ATTGTGTGATTTGGTAGGTAGTTTAG                             | CCAATAAAATTA AAAACTCTAAAAAAA                      |
| E330021D16Rik     | GATTAGTTATTTGAGTTGTTGATTAAG                            | CTAAAATTCCTAACATCCATCTTCC                         |
| Lphn2             | GTGGAGAATTATGGGTTAATAGAGT                              | AAATATACCCAACCTTAAACTAACC                         |
| CGI 4-1071        | GGAAGGTTATATGTGATTTAAGTTTT                             | ATCTTCAAAAATATTTCTTAACC                           |
| Pxdn              | GGTTATGATTTTTTTAATGATTTT                               | AACTTACCAAACCTCTACACAATACC                        |
| CGI 5-1386        | TTTTTTTTGTAATTGGTAATTTTGTATAT                          | AACCTCTCCTAACTACCCAATTCTC                         |
